# Supplementary material for: First report of ToCV and Detection of other Viruses in Field-grown Tomatoes in North-western Region of India
Source: Research Square preprint supplement (doi:10.21203/rs.3.rs-1357114/v1), 2022-03-02
Supplement: Supplementary file 1 [file c3a0c94c2d9355833470c8e4.doc]

**Table 2. List of different viruses and a viroid analysed in the present study along with their acronyms, type of genome, genus and family names, and primers used**

| **S.No.** | **Name of virus** | **Acronym** | **Genome** | **Genus** | **Family** | **Forward primer 5’-3’** | **Reverse primer 5’-3’** | **Predicted product size**  **(base pairs)** | **Reference**** |
| --- | --- | --- | --- | --- | --- | --- | --- | --- | --- |
| 1. | *Alfalfa mosaic virus* | AMV | (+) ssRNA | *Alfamovirus* | *Bromoviridae* | AACCTACTAAACGTTCTCAG | CTTCATACCTTGACCTTAATCC | 704 | [19] |
| 2. | *Cucumber mosaic virus* | CMV | (+) ssRNA | *Cucumovirus* | *Bromoviridae* | GTAGACATCTGTGACGCGA | GCGCGAAACAAGCTTCTTATC | 540 | [20] |
| 3. | *Groundnut bud necrosis virus* | GBNV | (+/-) ssRNA | *Orthotospovirus* | *Bunyaviridae* | AAGGATCCATGTCTAACGTAAAGCAACTAACCG | AACTCGAGTTACAATTCCAGCGAAGAACTAGCC | 831 | This study |
| 4. | *Impatiens necrotic spot virus* | INSV | (-) ssRNA | *Tospovirus* | *Bunyaviridae* | TAACACAACACAAAGCAAACC | CCAAATACTACTTTAACCGCA | 906 | [21] |
| 5. | *Potato leaf roll virus* | PLRV | (+) ssRNA | *Polerovirus* | *Luteoviridae* | CGCGCTAACAGAGTTCAGCC | CCAAATACTACTTTAACCGCA | 466 | [22] |
| 6. | *Potato mop top virus* | PMTV | (+) ssRNA | *Pomovirus* | *Virgaviridae* | AGAGCAGCCGTCGAGAATAG | TCGTCCACCTCTGCGAGTTG | 416 | [23] |
| 7. | *Potato spindle tuber viroid** | PSTVd | (+) ssRNA | Pospiviroid | Pospiviroidae | GGGATCCCCGGGGAAAC | AGCTTCAGTTGTWTCCACCGGGT | 200 | [24] |
| 8. | *Potato virus A* | PVA | (+) ssRNA | *Potyvirus* | *Potyviridae* | GTACTGAACTGGAAAAGTACT | CCCTGACAGTTGAAACATAA | 1,100 | [25] |
| 9. | *Potato virus M* | PVM | (+) ssRNA | *Carlavirus* | *Betaflexiviridae* | GCCACATCYGAGGACATGAT | GTGAGCTCSGGACCATTCAT | 524 | [23] |
| 10. | *Potato virus S* | PVS | (+) ssRNA | *Carlavirus* | *Betaflexiviridae* | GAGGCTATGCTGGAGCAGAG | AATCTCAGCGCCAAGCATCC | 738 | [23] |
| 11. | *Potato virus X* | PVX | (+) ssRNA | *Potexvirus* | *Alphaflexiviridae* | TAGCACAACACAGACCACAG | GGCAGCATTCATTTCAGCTTC | 562 | [26] |
| 12. | *Potato virus Y* | PVY | (+) ssRNA | *Potyvirus* | *Potyviridae* | ACTGTGATGAATGGGCTTATG | CGCATATATGGTTCCTTTTTG | 218 | [27] |
| 13. | *Tomato aspermy virus* | TAV | (+) ssRNA | *Cucumovirus* | *Bromoviridae* | CGGGATCCATGGCCCAAAACGG TACGGGA | GGAATTCTCACACCGGGAGCGTTGAAGCG | 657 | [28] |
| 14. | *Tomato bushy stunt virus* | TBSV | (+) ssRNA | *Tombusvirus* | *Tombusviridae* | CCAGGATTTCTCGACCTAGT | ATGGGATATCTCGATTGATC | 1102 | [29] |
| 15. | *Tomato infectious chlorosis virus* | TICV | (+) ssRNA | *Crinivirus* | *Closteroviridae* | TCAGTGCGTACGTTAATGGG | CACAGTATACAGCAGCGGCA | 501 | [30] |
| 16. | *Tomato chlorosis virus* | ToCV | (+) ssRNA | *Crinivirus* | *Closteroviridae* | AAGAATTCATGGAGAACAGTGCTGTTGCAAACA | AACTCGAGTTAGCAACCAGTTATCGATGCAAGT | 774 | [31] |
| 17. | *Tomato mosaic virus* | ToMV | (+) ssRNA | *Tobamovirus* | Virgaviridae | CGAGAGGGGCAACAAACAT | ACCTGTCTCCATCTCTTTGG | 318 | [32] |
| 18. | *Tobacco rattle virus* | TRV | (+) ssRNA | *Tobravirus* | *Virgaviridae* | GACGTGTGTACTCAAGGGTT | CAGTCTATACACAGAAACAGA | 463 | [33] |
| 19. | *Tomato spotted wilt virus* | TSWV | (+/-) ssRNA | *Tospovirus* | *Bunyaviridae* | TTAAGCAAGTTCTGTGAGTT | ATGTCTAAGGTTAAGCTCAC | 777 | [19] |
| 20. | *Tomato yellow leaf curl virus* | ToLCNDV  (DNA-A Begomovirus) | (+) ssDNA | *Begomovirus* | *Geminiviridae* | TGTGARGGYCCWTGYAARGTYCA | CARRTMMRRTTCAAYHACAACMTVMGGA | 827 | [34] |

*Viroid

**References used for primer designing
